# Supplementary material for: B-doped 3C-SiC nanowires with a finned microstructure for efficient visible light-driven photocatalytic hydrogen production
Source: Royal Society of Chemistry journal article supplement (doi:10.1039/c5nr01742d), 2015-01-01
Supplement: c5nr01742d1.pdf [file c5nr01742d1.pdf]

Electronic Supporting Information

**B-doped 3C-SiC nanowires with finned microstructure for  
efficient visible-light-driven photocatalytic hydrogen  
production**

*Tao Yang,<sup>a</sup> Xiwang Chang,<sup>a</sup> Junhong Chen,<sup>b</sup> Kuo-Chih Chou<sup>a</sup> and Xinmei Hou<sup>a\*</sup>*

<sup>a</sup> State Key Laboratory of Advanced Metallurgy, University of Science and Technology Beijing, Beijing 100083, China

Email: houxinmei@ustb.edu.cn.

<sup>b</sup> School of Material Science and Engineering, University of Science and Technology Beijing, Beijing 100083, China

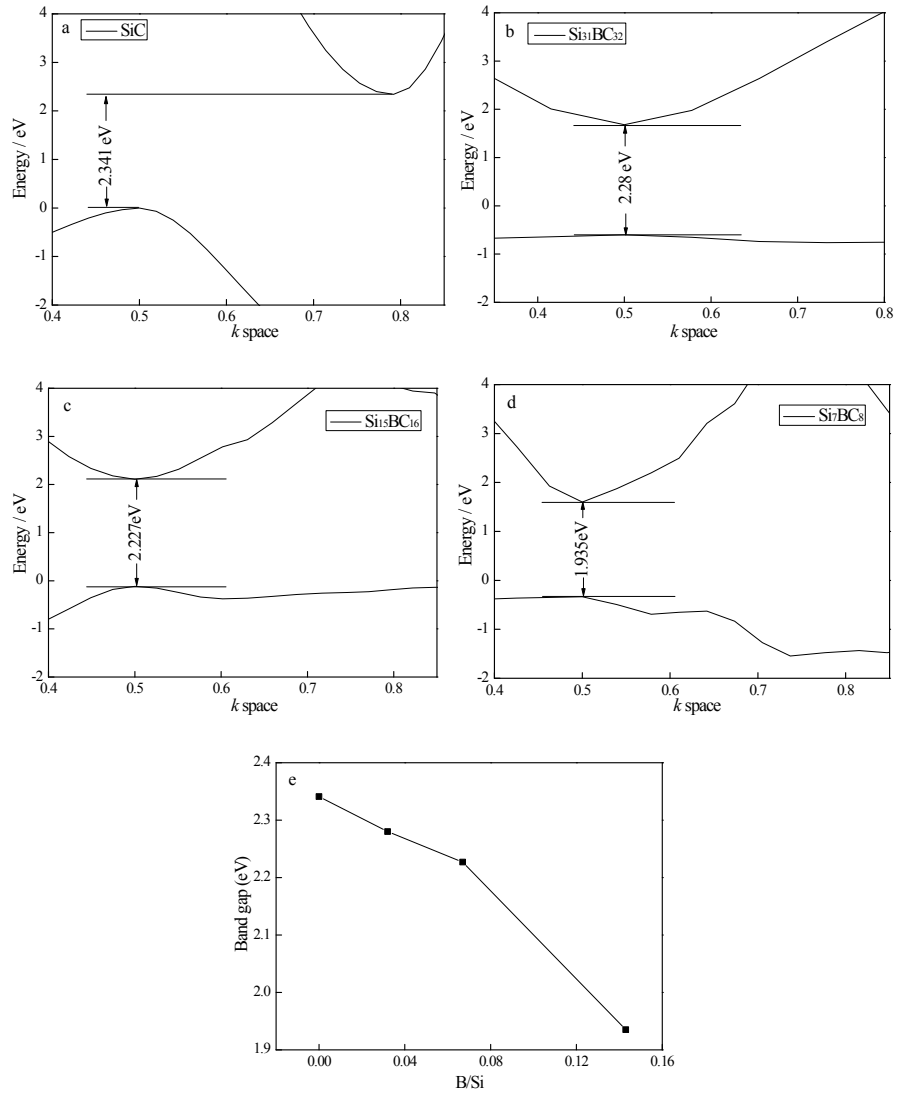

Fig. S1 (a)-(d) Calculated PDOS of 3C-SiC and B-doped 3C-SiC including  $\text{Si}_{31}\text{BC}_{32}$ ,  $\text{Si}_{15}\text{BC}_{16}$  and  $\text{Si}_7\text{BC}_8$ , (e) is the band gap of  $\text{Si}_{n-1}\text{BC}_n$  ( $n=8, 16, 32$ ).

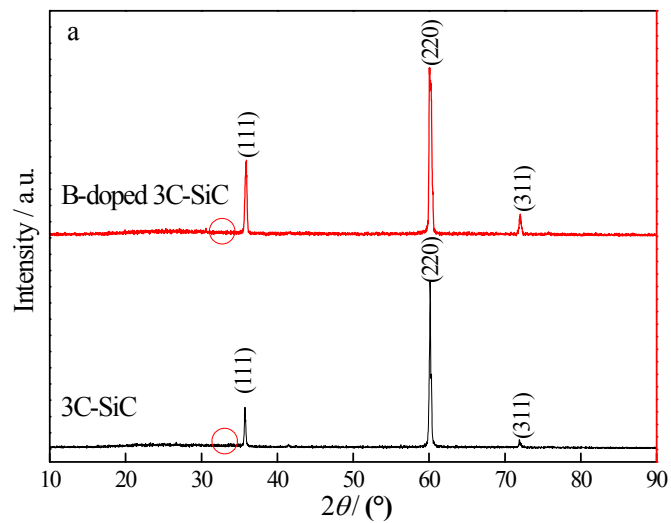

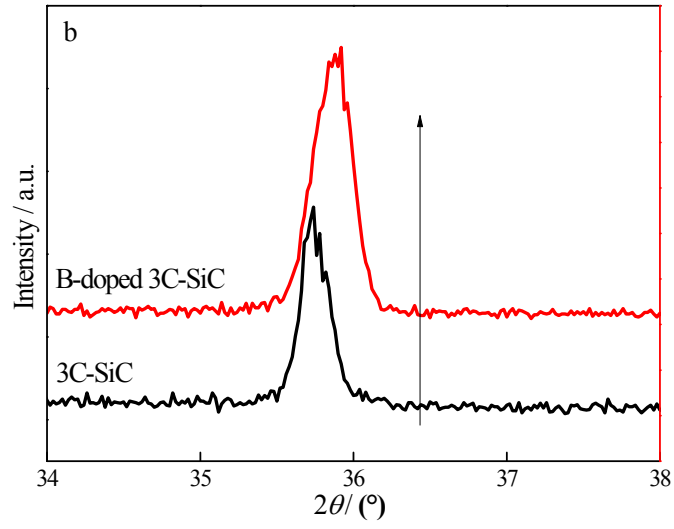

Fig. S2. XRD patterns of the as-prepared (a) and the magnification of the diffraction peak (111) (b)

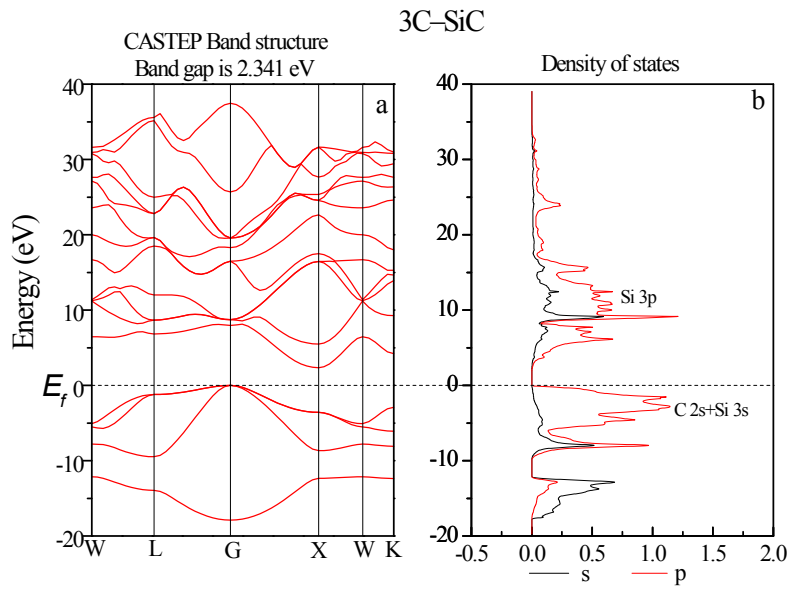

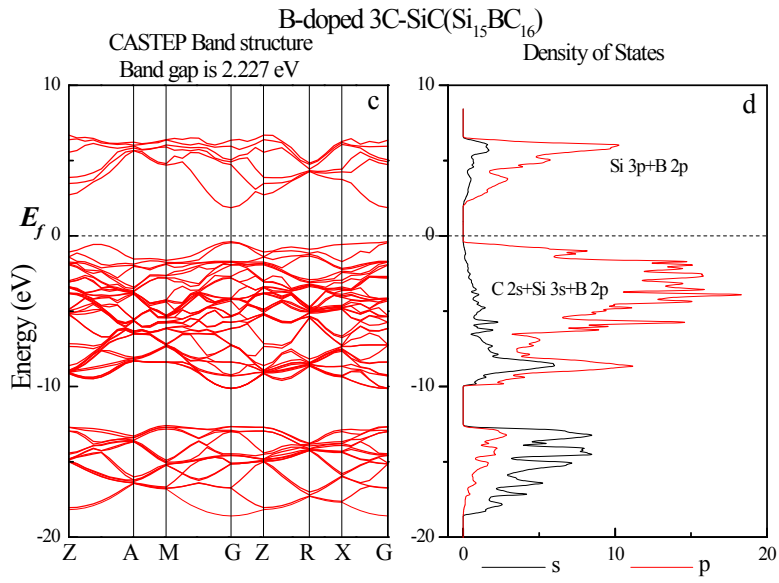

Fig. S3. The calculated energy band and density of states (DOS) of pure 3C-SiC (a and b) and B-doped 3C-SiC (c and d)

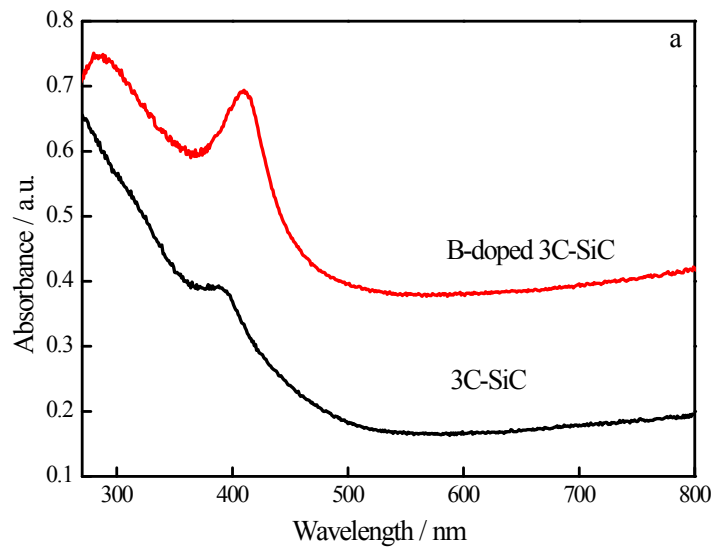

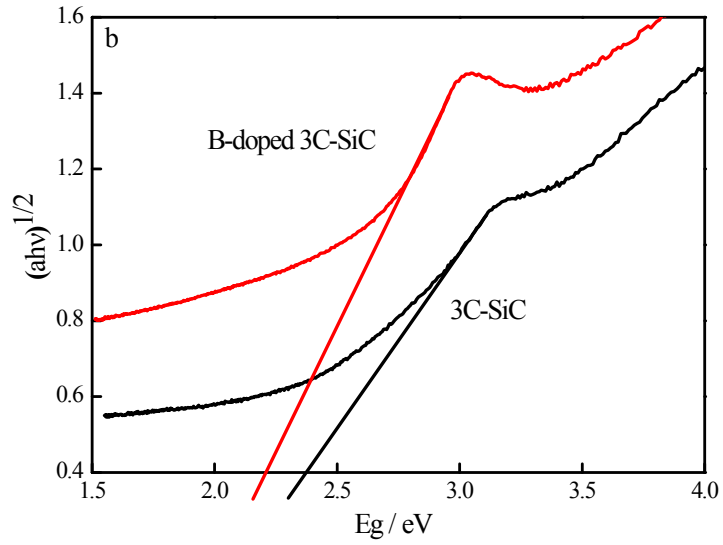

Fig. S4. (a) UV-Vis diffusion reflectance spectra (b) The plots of  $(\alpha hv)^{1/2}$  versus  $h\nu$ . The bandgap of the samples

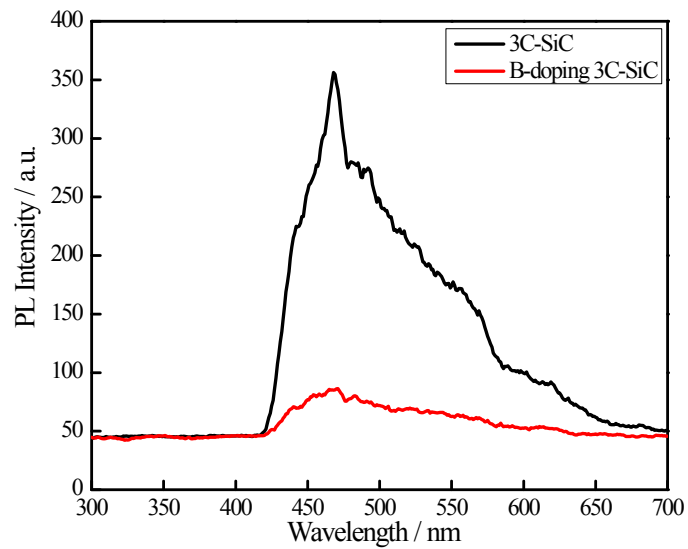

Fig. S5 Photoluminescence spectra of 3C-SiC and B-doped 3C-SiC.

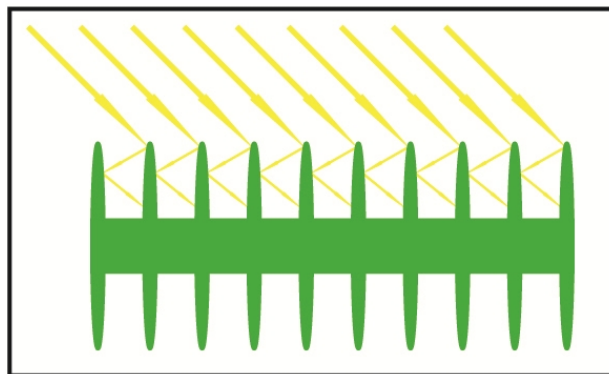

Fig. S6 Light reflection models in the B-doped 3C-SiC nanowires.

**Table S1** Calculation conditions for geometry optimization and energy task

| Task: Geometry optimization |                              | Energy                       |                            |
|-----------------------------|------------------------------|------------------------------|----------------------------|
| Functional                  | GGA PW91                     | LDA CA-PZ <sup>1,2</sup>     |                            |
| Minimizer                   | Fine quality                 | -                            |                            |
|                             | Energy:                      | 1.0e-5 eV/atom               | -                          |
|                             | Max force:                   | 0.03 eV/Å                    | -                          |
|                             | Max stress:                  | 0.05 GPa                     | -                          |
|                             | Max displacement:            | 0.001 Å                      | -                          |
| Algorithm                   | BFGS:                        | use line search              | -                          |
| Stress                      | 0 for all                    | -                            |                            |
| Energy cutoff               | 700 eV                       | 700 eV                       |                            |
| SCF tolerance               | 1.0*10 <sup>-6</sup> eV/atom | 1.0*10 <sup>-6</sup> eV/atom |                            |
| Pseudopotentials            | Ultrasoft <sup>3</sup>       | Norm-conserving <sup>4</sup> |                            |
| FFT grid density            | Fine quality                 | Standard                     |                            |
| Finite basis correction     | Smart                        | Smart                        |                            |
| Electronic minimizer        | Density Mixing               | Density Mixing               |                            |
| Orbital occupancy           | Fixed                        | Fixed                        |                            |
| <i>k</i> point quality      | Fine quality                 | Fine quality                 |                            |
| Band structure              | Unchecked                    | Checked                      | Fine quality k point set   |
| Density of states           | Unchecked                    | Checked                      | Medium quality k point set |

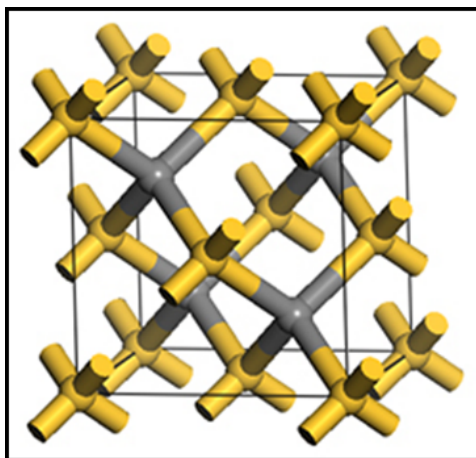

Scheme 1. 3C-SiC with a zinc blende structure

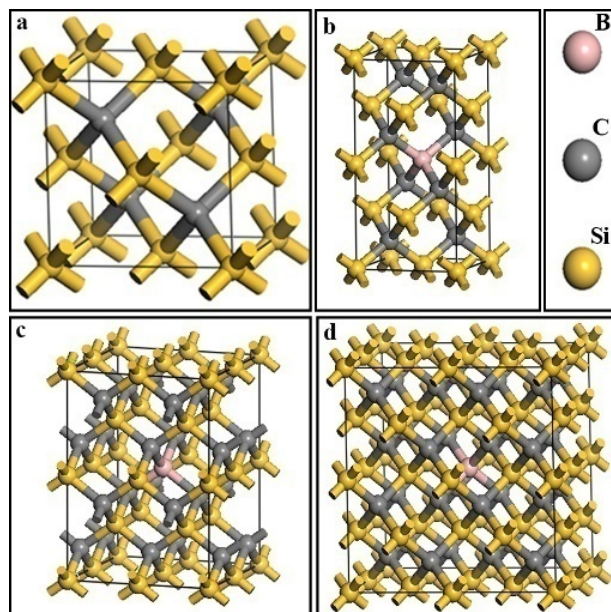

Scheme 2. Structures of calculation models

## References

- 1 D. M. Ceperley and B. J. Alder, Phys. Rev. Lett., 1980, 45, 566-569.
- 2 J. P. Perdew, A. Zunger, J. P. Perdew and A. Zunger, Phys. Rev. B, 1981, 23, 5048-5079.
- 3 D. Vanderbilt, Phys. Rev. B, 1990, 41, 7892-7895.
- 4 D. R., Hamann, M. Schlüter and C. Chiang, Phys. Rev. Lett., 1979, 43, 1494-1497.
